# Supplementary material for: Whole-Genome Sequencing and Mutation Analyses of SARS-CoV-2 Isolates from Indonesia
Source: MDPI journal article supplement (doi:10.3390/pathogens13040279), 2024-03-25
Supplement: s1 [file s1]

**A**

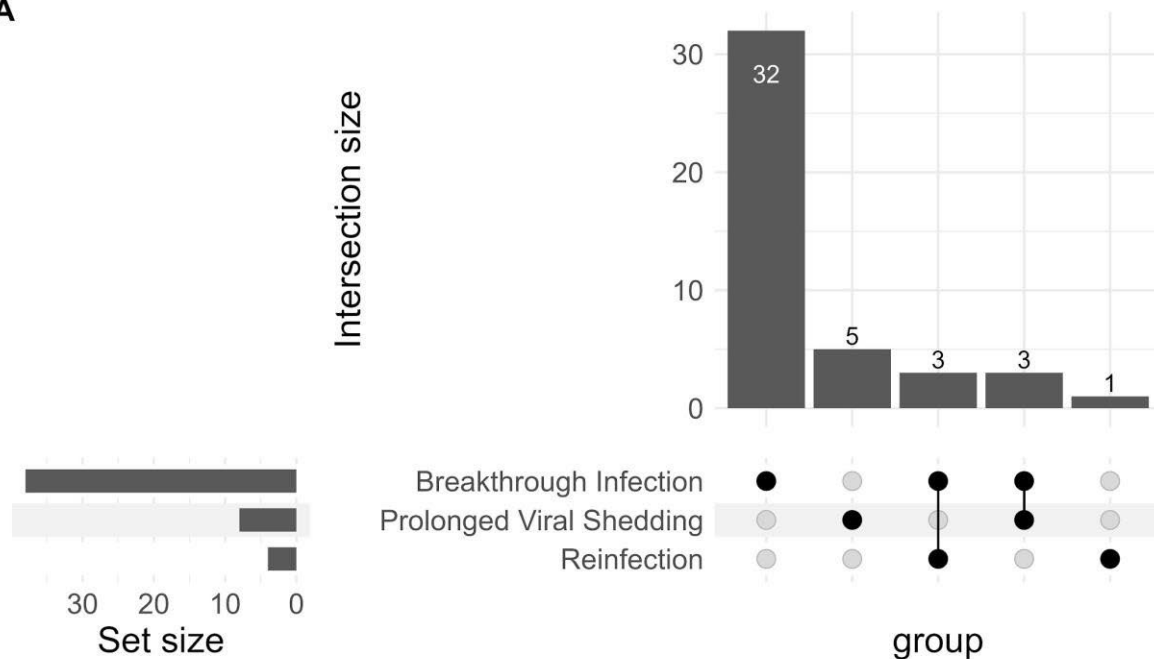

**B**

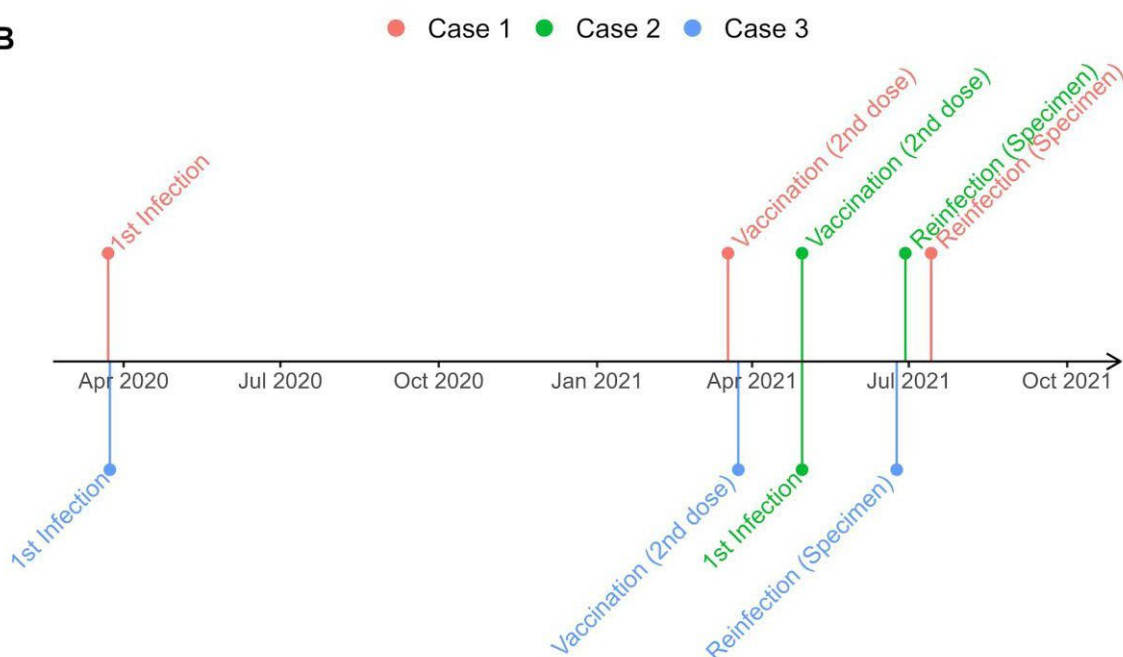

**Figure S1.** Characteristics of breakthrough infection, prolonged viral shedding, and reinfection in patients positive for SARS-CoV-2. **(A)** An upset plot showing the co-occurrence of these cases. **(B)** Timeline of first and second infections and vaccination dates among three cases with combined breakthrough infection and reinfection.

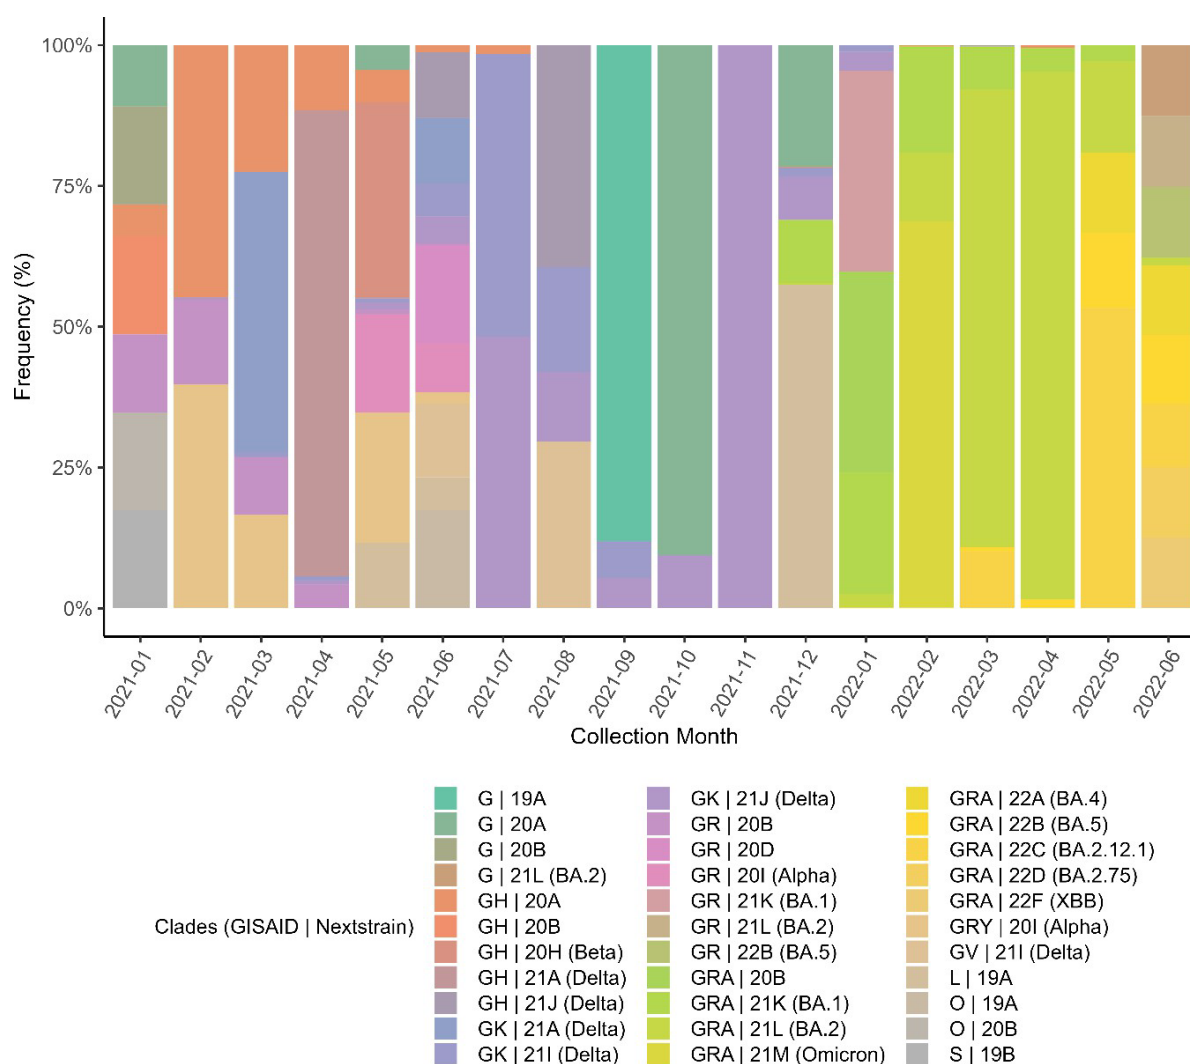

**Figure S2.** The distribution of GISAID and Nextstrain clades of SARS-CoV-2 genome from selected Indonesia dataset, comprising 7,515 published sequences on GISAID collected from January 1, 2021, to June 30, 2022. These sequences belonged to respective regions similar to the study site, specifically from Bangka Belitung ( $n = 159$ ), Central Kalimantan ( $n = 224$ ), East Nusa Tenggara ( $n = 280$ ), Greater Jakarta/Jabodetabek ( $n = 4,017$ ), Jambi ( $n = 679$ ), Maluku ( $n = 79$ ), North Sulawesi ( $n = 258$ ), and West Java ( $n = 1,819$ ). The associated dataset is available on GISAD at [doi.org/10.55876/gis8.231201wt](https://doi.org/10.55876/gis8.231201wt) (accessed on December 1, 2023).

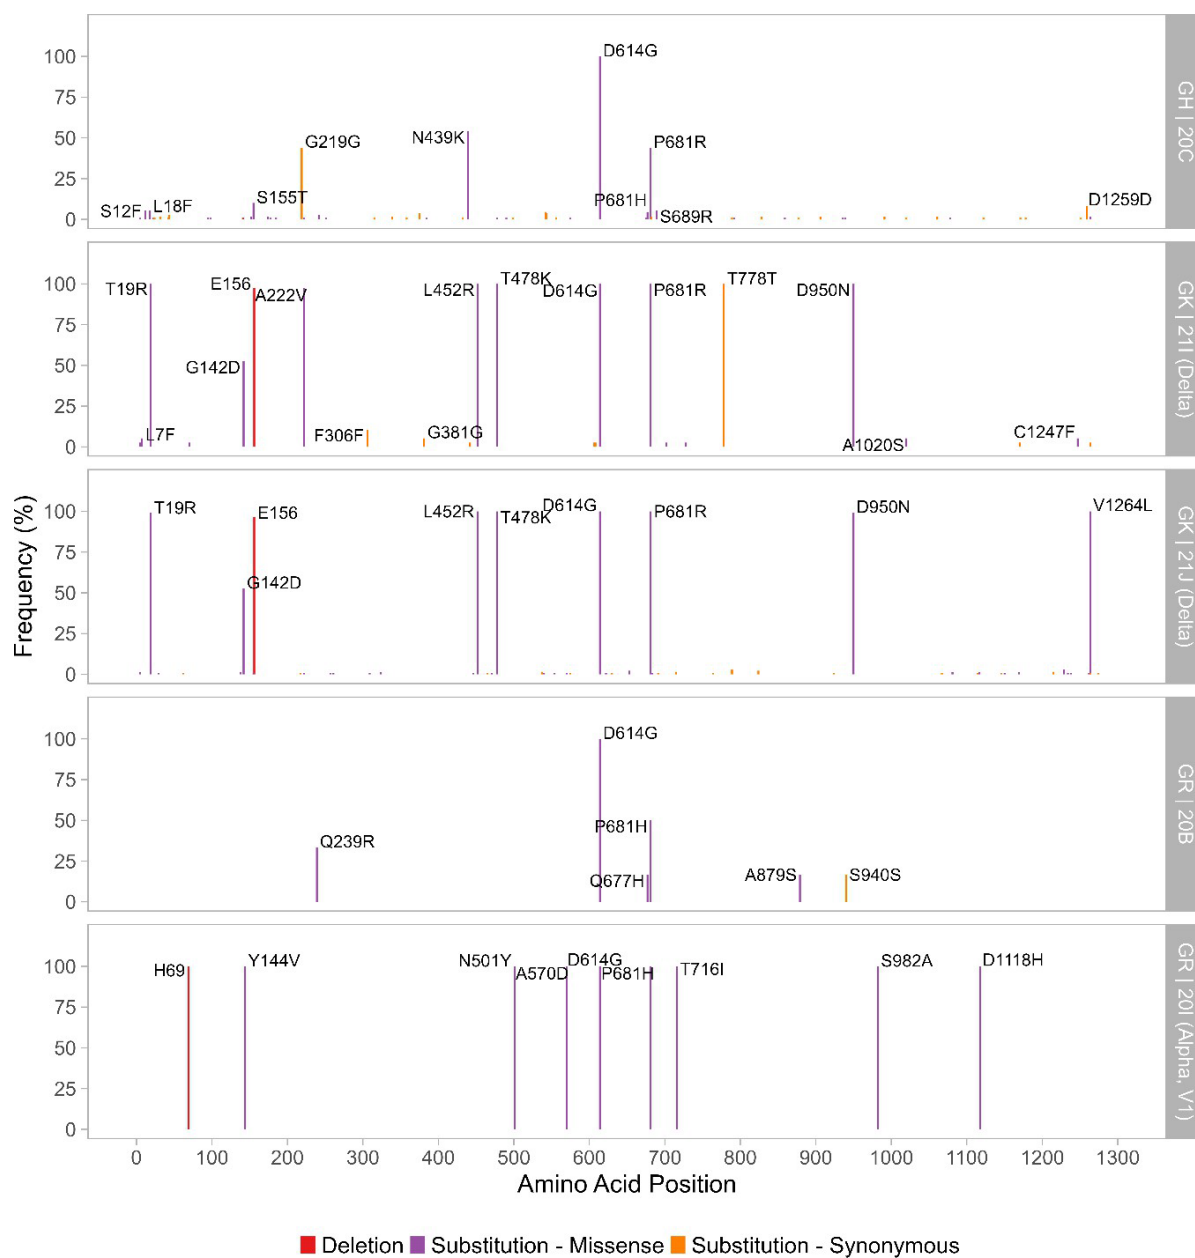

**Figure S3.** The distribution of mutation events in the spike (S) protein sequence, stratified by SARS-CoV-2 clades. Mutations with a frequency of >5% are indicated.

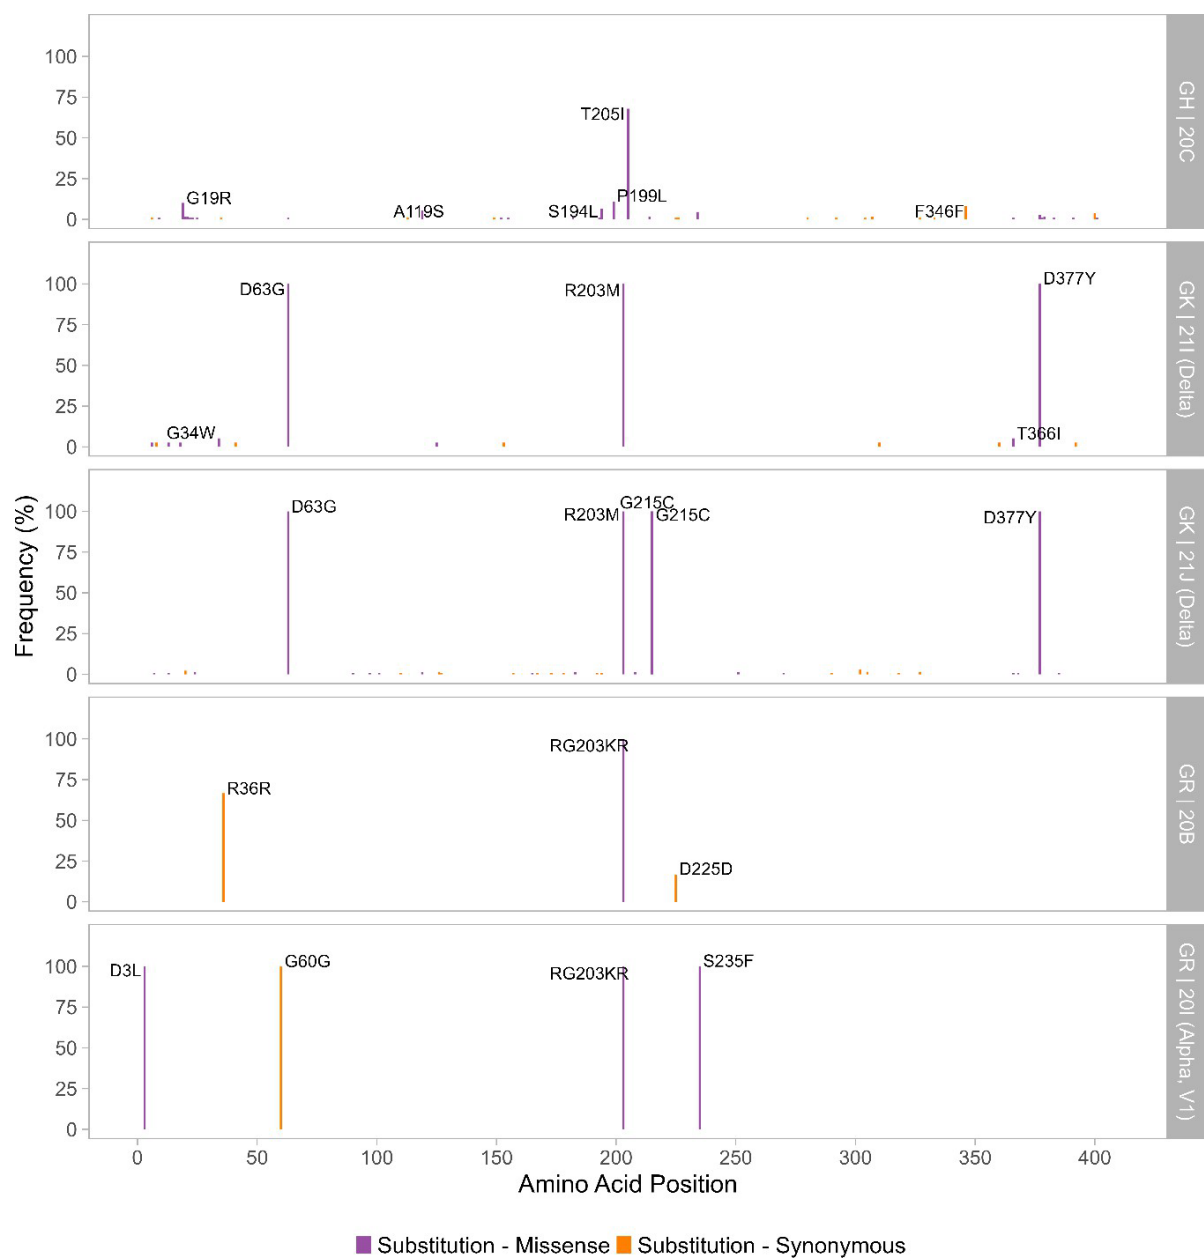

**Figure S4.** The distribution of mutation events in the nucleocapsid (N) protein sequence, stratified by SARS-CoV-2 clades. Mutations with a frequency of >5% are indicated.

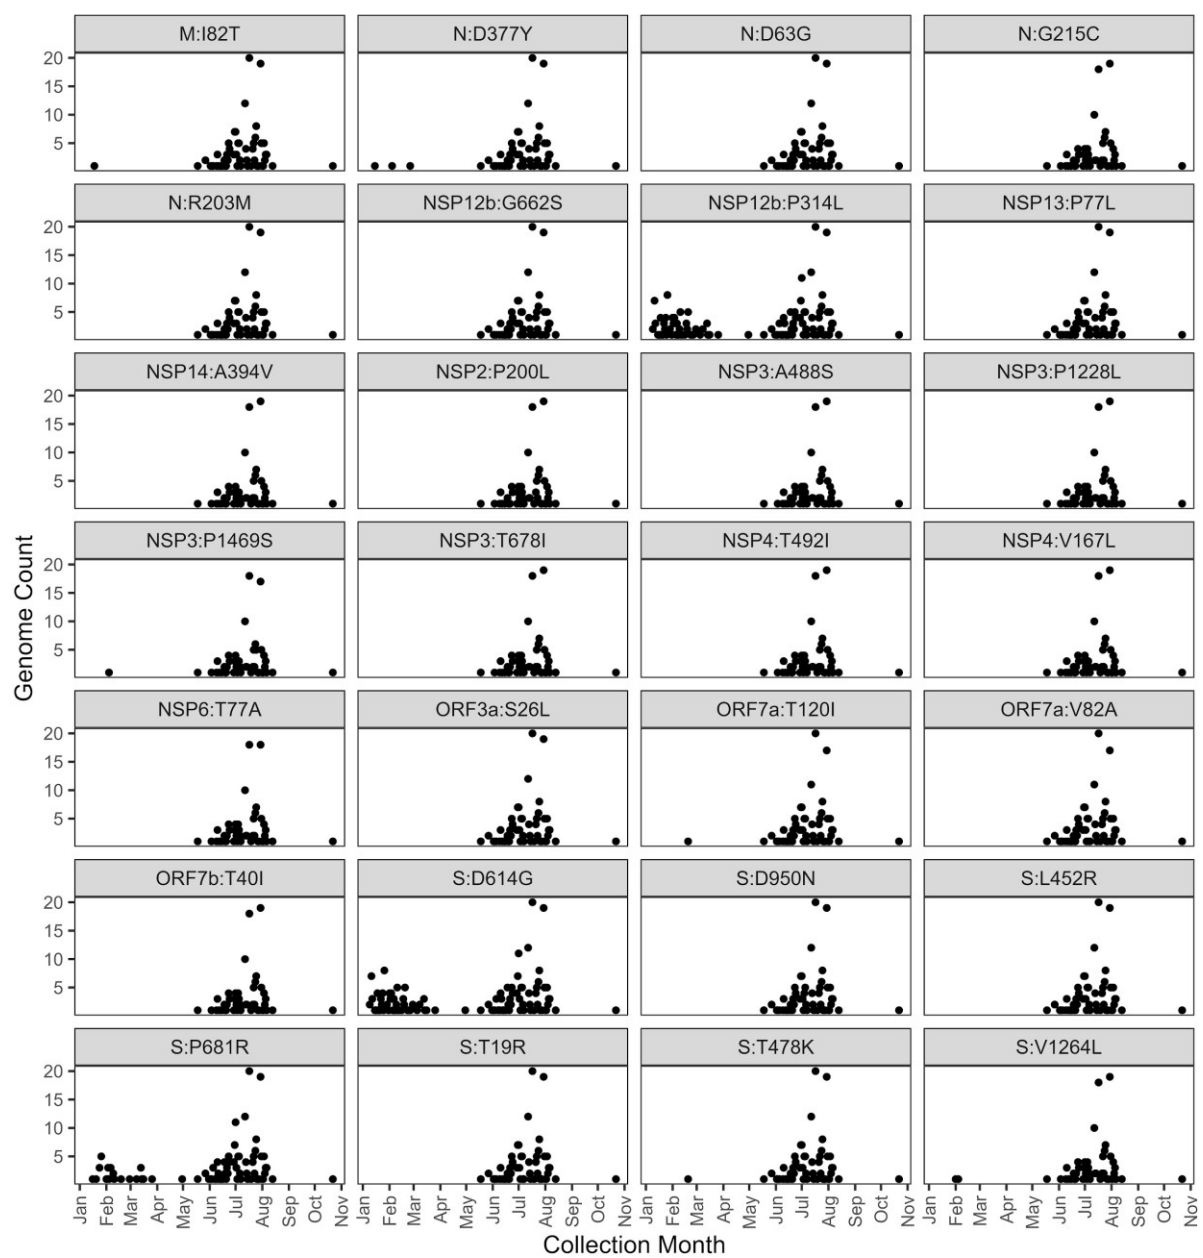

**Figure S5.** Timeline of amino acid substitution in SARS-CoV-2 genomes from Indonesian isolates.

**Table S1.** Baseline characteristics of the studied participant, stratified by region.

| Characteristic   |                  | Bangka Belitung<br>(n = 35) | Central Kalimantan<br>(n = 52) | East Nusa Tenggara<br>(n = 23) | Greater Jakarta<br>(n = 58) | Jambi<br>(n = 38) | Maluku<br>(n = 36) | North Sulawesi<br>(n = 32) | West Java<br>(n = 18) |
|------------------|------------------|-----------------------------|--------------------------------|--------------------------------|-----------------------------|-------------------|--------------------|----------------------------|-----------------------|
| Age              | Median (IQR)     | 41 (28-50)                  | 33.5 (28-45.2)                 | 30 (24-32.5)                   | 30 (24.2-37.8)              | 31 (27-47)        | 34.5 (25.5-46)     | 38.5 (30-53.2)             | 34 (28-47.8)          |
| Sex              | Female           | 18 (51%)                    | 24 (46%)                       | 8 (35%)                        | 33 (57%)                    | 18 (47%)          | 14 (39%)           | 17 (53%)                   | 8 (44%)               |
|                  | Male             | 17 (49%)                    | 28 (54%)                       | 15 (65%)                       | 25 (43%)                    | 20 (53%)          | 22 (61%)           | 15 (47%)                   | 10 (56%)              |
| Collection month | January          | 2 (6%)                      | 6 (12%)                        | 14 (61%)                       | 3 (5%)                      | 5 (13%)           | 0 (0%)             | 7 (22%)                    | 6 (33%)               |
|                  | February         | 4 (11%)                     | 14 (27%)                       | 9 (39%)                        | 1 (2%)                      | 4 (11%)           | 0 (0%)             | 1 (3%)                     | 12 (67%)              |
|                  | March            | 0 (0%)                      | 1 (2%)                         | 0 (0%)                         | 8 (14%)                     | 0 (0%)            | 0 (0%)             | 0 (0%)                     | 0 (0%)                |
|                  | April            | 0 (0%)                      | 0 (0%)                         | 0 (0%)                         | 1 (2%)                      | 0 (0%)            | 0 (0%)             | 0 (0%)                     | 0 (0%)                |
|                  | May              | 1 (3%)                      | 0 (0%)                         | 0 (0%)                         | 3 (5%)                      | 0 (0%)            | 0 (0%)             | 0 (0%)                     | 0 (0%)                |
|                  | June             | 4 (11%)                     | 21 (40%)                       | 0 (0%)                         | 24 (41%)                    | 4 (11%)           | 0 (0%)             | 0 (0%)                     | 0 (0%)                |
|                  | July             | 22 (63%)                    | 10 (19%)                       | 0 (0%)                         | 15 (26%)                    | 25 (66%)          | 36 (100%)          | 12 (38%)                   | 0 (0%)                |
|                  | August           | 2 (6%)                      | 0 (0%)                         | 0 (0%)                         | 2 (3%)                      | 0 (0%)            | 0 (0%)             | 12 (38%)                   | 0 (0%)                |
|                  | October          | 0 (0%)                      | 0 (0%)                         | 0 (0%)                         | 1 (2%)                      | 0 (0%)            | 0 (0%)             | 0 (0%)                     | 0 (0%)                |
|                  | Unknown          | 29 (83%)                    | 36 (69%)                       | 23 (100%)                      | 53 (91%)                    | 36 (95%)          | 36 (100%)          | 7 (22%)                    | 16 (89%)              |
| Hospitalized     | Yes              | 6 (17%)                     | 16 (31%)                       | 0 (0%)                         | 5 (9%)                      | 2 (5%)            | 0 (0%)             | 25 (78%)                   | 2 (11%)               |
|                  | Unknown          | 29 (83%)                    | 36 (69%)                       | 23 (100%)                      | 53 (91%)                    | 36 (95%)          | 36 (100%)          | 7 (22%)                    | 16 (89%)              |
| Other conditions | BI <sup>1</sup>  | 0 (0%)                      | 0 (0%)                         | 0 (0%)                         | 32 (55%)                    | 0 (0%)            | 0 (0%)             | 0 (0%)                     | 0 (0%)                |
|                  | PVS <sup>2</sup> | 0 (0%)                      | 0 (0%)                         | 0 (0%)                         | 5 (9%)                      | 0 (0%)            | 0 (0%)             | 0 (0%)                     | 0 (0%)                |
|                  | RI <sup>3</sup>  | 0 (0%)                      | 0 (0%)                         | 0 (0%)                         | 1 (2%)                      | 0 (0%)            | 0 (0%)             | 0 (0%)                     | 0 (0%)                |
|                  | BI+PVS           | 0 (0%)                      | 0 (0%)                         | 0 (0%)                         | 3 (5%)                      | 0 (0%)            | 0 (0%)             | 0 (0%)                     | 0 (0%)                |
|                  | BI+RI            | 0 (0%)                      | 0 (0%)                         | 0 (0%)                         | 3 (5%)                      | 0 (0%)            | 0 (0%)             | 0 (0%)                     | 0 (0%)                |

<sup>1</sup> BI, breakthrough infection. Patients confirmed positive more than 14 days after the second dose of vaccination.

<sup>2</sup> PVS, prolonged viral shedding. Viral particles were still detected for over a month after laboratory confirmation.

<sup>3</sup> RI, reinfection.

**Table S2.** Characteristics of study subjects with breakthrough infection, prolonged viral shedding, and reinfection.

| Characteristic      |                  | BI <sup>1</sup> (n = 32) | PVS <sup>2</sup> (n = 5) | RI <sup>3</sup> (n = 1) | BI+PVS (n = 3)   | BI+RI (n = 3)    |
|---------------------|------------------|--------------------------|--------------------------|-------------------------|------------------|------------------|
| Age                 | Median (IQR)     | 26 (24-29)               | 41 (39-45)               | 41                      | 28 (27-29.5)     | 41 (33.5-45)     |
| Sex                 | Female           | 21 (66%)                 | 1 (20%)                  | 1 (100%)                | 2 (67%)          | 3 (100%)         |
|                     | Male             | 11 (34%)                 | 4 (80%)                  | 0 (0%)                  | 1 (33%)          | 0 (0%)           |
| Hospital location   | Greater Jakarta  | 32 (100%)                | 5 (100%)                 | 1 (100%)                | 3 (100%)         | 3 (100%)         |
| Collection month    | March            | 2 (6%)                   | 0 (0%)                   | 0 (0%)                  | 0 (0%)           | 0 (0%)           |
|                     | April            | 0 (0%)                   | 0 (0%)                   | 1 (100%)                | 0 (0%)           | 0 (0%)           |
|                     | June             | 17 (53%)                 | 4 (80%)                  | 0 (0%)                  | 1 (33%)          | 2 (67%)          |
|                     | July             | 12 (38%)                 | 1 (20%)                  | 0 (0%)                  | 1 (33%)          | 1 (33%)          |
|                     | August           | 1 (3%)                   | 0 (0%)                   | 0 (0%)                  | 1 (33%)          | 0 (0%)           |
| Hospitalized        | Yes              | 1 (3%)                   | 0 (0%)                   | 0 (0%)                  | 1 (33%)          | 1 (33%)          |
|                     | Unknown          | 31 (97%)                 | 5 (100%)                 | 1 (100%)                | 2 (67%)          | 2 (67%)          |
| Fully vaccinated    | Yes              | 32 (100%)                | 5 (100%)                 | 0 (0%)                  | 3 (100%)         | 3 (100%)         |
|                     | No               | 0 (%)                    | 0 (%)                    | 0 (0%)                  | 0 (0%)           | 0 (0%)           |
|                     | NA               | 0 (%)                    | 0 (%)                    | 1 (100%)                | 0 (0%)           | 0 (0%)           |
| BI intervals (days) | Median (IQR)     | 127.5 (111.5-139.5)      | NA                       | NA                      | NA               | 92 (76-105)      |
| Median PCR Ct value | N gene           | 18.0 (16.2-21.3)         | 14.7 (14.4-18.3)         | 15.3                    | 16.4 (15.2-20.1) | 18.1 (17.7-23.9) |
|                     | ORF1ab gene      | 17.2 (14.9-20.2)         | 14.7 (13.0-18.2)         | 16.8                    | 15.6 (14.4-18.5) | 17.5 (17.3-22.7) |
| Clade               | GH   20C         | 2 (6.3%)                 | 0 (%)                    | 1 (100%)                | 0 (0%)           | 0 (0%)           |
|                     | GK   21J (Delta) | 18 (56.2%)               | 5 (100%)                 | 0 (0%)                  | 3 (100%)         | 2 (67%)          |
|                     | GK   21I (Delta) | 12 (37.5%)               | 0 (%)                    | 0 (0%)                  | 0 (0%)           | 1 (33%)          |
| Lineage             | B.1.466.2        | 2 (6.2%)                 | 0 (%)                    | 1 (100%)                | 0 (0%)           | 0 (0%)           |
|                     | AY.23            | 18 (56.3%)               | 5 (100%)                 | 0 (0%)                  | 3 (100%)         | 2 (67%)          |
|                     | AY.24            | 12 (37.5%)               | 0 (%)                    | 0 (0%)                  | 0 (0%)           | 1 (33%)          |

<sup>1</sup> BI, breakthrough infection. Patients confirmed positive more than 14 days after the second dose of vaccination.

<sup>2</sup> PVS, prolonged viral shedding. Viral particles were still detected for over a month after laboratory confirmation.

<sup>3</sup> RI, reinfection.

NA: data not available.

## SUPPLEMENTAL TABLE

### **Data Availability**

GISAID Identifier: EPI\_SET\_230328gx

doi: [10.55876/gis8.230328gx](https://doi.org/10.55876/gis8.230328gx)

All genome sequences and associated metadata in this dataset are published in GISAID's EpiCoV database. To view the contributors of each individual sequence with details such as accession number, Virus name, Collection date, Originating Lab and Submitting Lab and the list of Authors, visit [10.55876/gis8.230328gx](https://gisaid.org/WIV04)

### **Data Snapshot**

- EPI\_SET\_230328gx is composed of 276 individual genome sequences.
- The collection dates range from 2021-01-09 to 2021-10-22;
- Data were collected in 1 countries and territories;
- All sequences in this dataset are compared relative to hCoV-19/Wuhan/WIV04/2019 (WIV04), the official reference sequence employed by GISAID (EPI\_ISL\_402124). Learn more at <https://gisaid.org/WIV04>.

## SUPPLEMENTAL TABLE

### **Data Availability**

GISAID Identifier: EPI\_SET\_231201wt

doi: [10.55876/gis8.231201wt](https://doi.org/10.55876/gis8.231201wt)

All genome sequences and associated metadata in this dataset are published in GISAID's EpiCoV database. To view the contributors of each individual sequence with details such as accession number, Virus name, Collection date, Originating Lab and Submitting Lab and the list of Authors, visit [10.55876/gis8.231201wt](https://gisaid.org/231201wt)

### **Data Snapshot**

- EPI\_SET\_231201wt is composed of 7,515 individual genome sequences.
- The collection dates range from 2021-01-01 to 2022-06-30;
- Data were collected in 1 countries and territories;
- All sequences in this dataset are compared relative to hCoV-19/Wuhan/WIV04/2019 (WIV04), the official reference sequence employed by GISAID (EPI\_ISL\_402124). Learn more at <https://gisaid.org/WIV04>.
